# Supplementary material for: The severity of sediment desiccation affects the adsorption characteristics and speciation of phosphorus
Source: Royal Society of Chemistry journal article supplement (doi:10.1039/c5em00523j), 2015-12-08

The severity of sediment desiccation affects the adsorption characteristics and speciation of phosphorus.

Nirmala W. Attygalla, Darren S. Baldwin, Ewen Silvester, Peter Kappen and Kerry L. Whitworth

#### ELECTRONIC SUPPLEMENTARY INFORMATION

ESI Figure 1. Total electron yield P  $L_{2,3}$ -edge XANES (X-ray Absorption Near Edge Structure) spectra of selected samples. Shown are: i) spectrum of fresh sediment (freeze dried), ii) phytic acid reference material diluted with clay to give a final concentration of 25 000 ppm P, and iii) fresh sediment doped with phytic acid at 2500 ppm P.

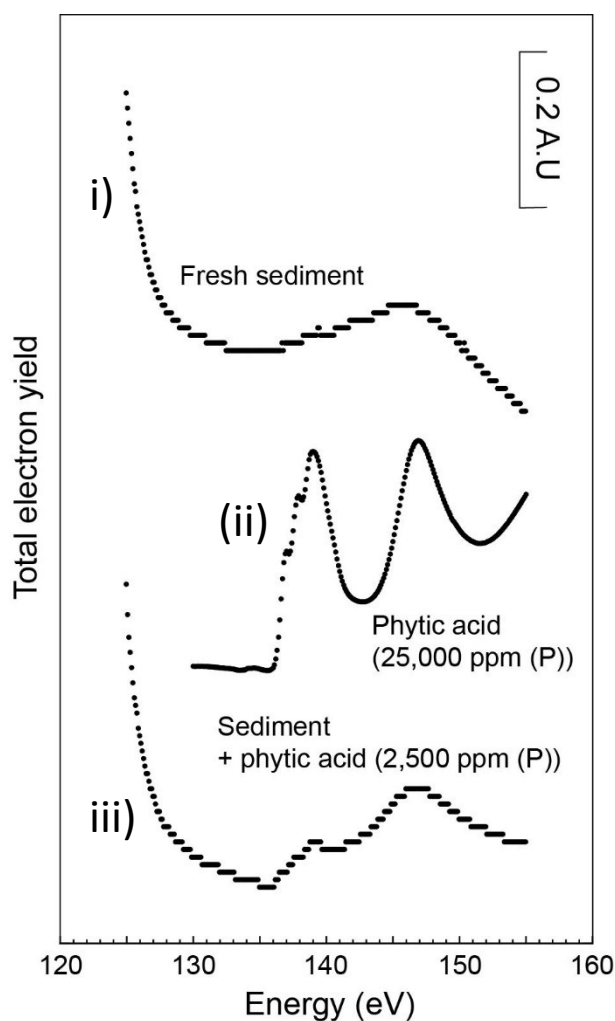

Supplement: c5em00523j1.pdf [file c5em00523j1.pdf]
